# Supplementary material for: A distal lung organoid model to study interstitial lung disease, viral infection and human lung development
Source: Springer Nature journal article supplement (doi:10.1038/s41596-023-00827-6), 2023-05-10
Supplement: MOESM1 [file 41596_2023_827_MOESM1_ESM22.pdf]

---

## Supplementary information

---

# A distal lung organoid model to study interstitial lung disease, viral infection and human lung development

---

In the format provided by the  
authors and unedited

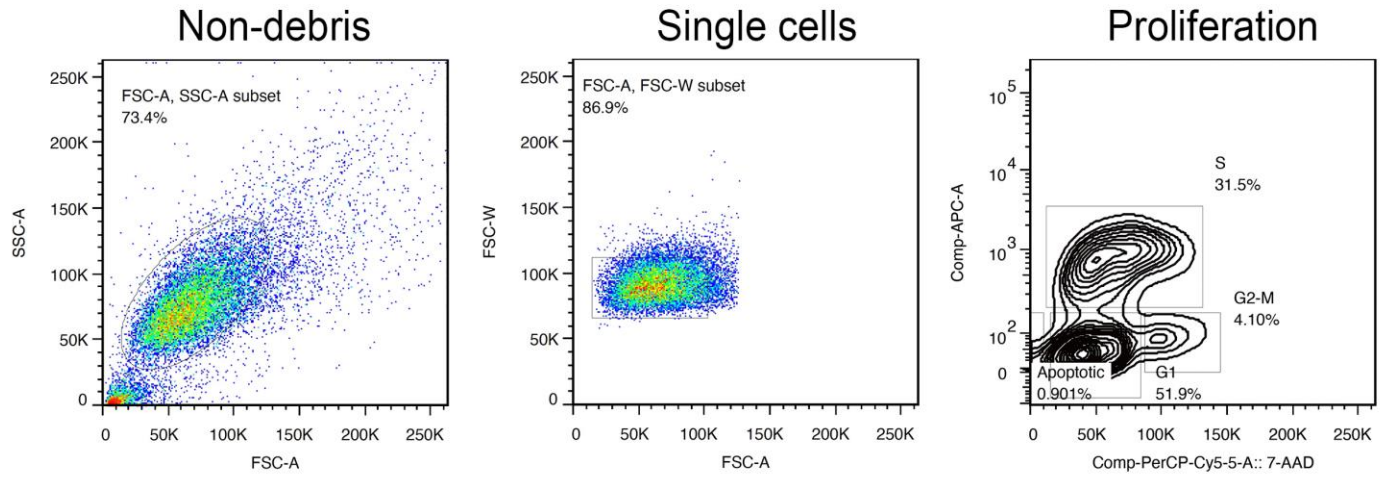

**Supplementary Figure 1. Flow cytometry gating strategy for proliferation analysis.** For gating strategy to select for single cells, first gate for non-debris and select for single cells as shown in the above figure. The cell cycle stages of gated cells can be determined by analyzing the correlated expression of total DNA and incorporated BrdU amount.
